# Supplementary material for: Effect of Weather on COVID-19 Transmission and Mortality in Lagos, Nigeria
Source: Scientifica (Cairo). 2020 Aug 18;2020:2562641. doi: 10.1155/2020/2562641 (PMC7443043; doi:10.1155/2020/2562641)
Supplement: Supplementary Materials — COVID-19 incidence and mortality in Lagos, Nigeria, and associated weather variables. [file 2562641.f1.xlsx]

## Sheet: Sheet 1
	COVID-19 Incidence and Mortality in Lagos, Nigeria and Associated Weather Variables (Atmospheric Temperature and Humidity)
Date	Incidence	Cumulative Incidence	Mortality	Cumulative Mortality	Min. Temp. (°C)	Max. Temp. (°C)	Average Temp. (°C)	1Wk Adjusted Average Temp. (°C)	2Wk Adjusted Average Temp. (°C)	Min. Humidity (%)	Max. Humidity (%)	Average Humidity (%)	1Wk Adjusted Average Humidity (%)	2Wk Adjusted Average Humidity (%)
09.03.2020	1	2	0	0	27	33	30	31.5	32	68	88	79.75	79.75	78
10.03.2020	0	2	0	0	28	35	31.5	28	31.5	66	88	79.5	83.5	79.25
11.03.2020	0	2	0	0	28	35	31.5	30.5	31	64	91	81.25	80.25	81
12.03.2020	0	2	0	0	25	35	30	31	31.5	67	94	81.5	81	76
13.03.2020	0	2	0	0	27	35	31	31	30.5	66	89	80.25	85	81.25
14.03.2020	0	2	0	0	25	33	29	30.5	31	69	90	83.5	82.75	80.75
15.03.2020	0	2	0	0	26	34	30	31	31	66	94	81	76.25	82.25
16.03.2020	0	2	0	0	27	35	31	30	31.5	64	93	81.25	79.75	79.75
17.03.2020	1	3	0	0	27	35	31	31.5	28	64	91	80.75	79.5	83.5
18.03.2020	4	7	0	0	28	35	31.5	31.5	30.5	62	93	80.25	81.25	80.25
19.03.2020	4	11	0	0	28	34	31	30	31	65	90	79.75	81.5	81
20.03.2020	0	11	0	0	28	33	30.5	31	31	70	89	81.75	80.25	85
21.03.2020	7	18	0	0	27	34	30.5	29	30.5	65	94	82.75	83.5	82.75
22.03.2020	4	22	0	0	27	34	30.5	30	31	64	93	79.5	81	76.25
23.03.2020	3	25	0	0	27	31	29	31	30	75	90	84.5	81.25	79.75
24.03.2020	4	29	0	0	23	29	26	31	31.5	80	97	88.25	80.75	79.5
25.03.2020	3	32	0	0	25	33	29	31.5	31.5	67	93	82.25	80.25	81.25
26.03.2020	12	44	0	0	25	33	29	31	30	65	93	81	79.75	81.5
27.03.2020	8	52	0	0	27	33	30	30.5	31	72	93	84.5	81.75	80.25
28.03.2020	7	59	0	0	26	34	30	30.5	29	64	93	79.75	82.75	83.5
29.03.2020	9	68	0	0	26	35	30.5	30.5	30	61	86	78	79.5	81
30.03.2020	13	82	0	0	27	34	30.5	29	31	65	92	81.25	84.5	81.25
31.03.2020	1	83	0	0	27	34	30.5	26	31	67	93	81.5	88.25	80.75
01.04.2020	9	91	0	0	25	33	29	29	31.5	66	96	83	82.25	80.25
02.04.2020	7	98	0	0	25	33	29	29	31	66	90	81.25	81	79.75
03.04.2020	11	109	1	1	27	34	30.5	30	30.5	61	90	76.5	84.5	81.75
04.04.2020	0	109	0	1	20	31	25.5	30	30.5	70	91	85	79.75	82.75
05.04.2020	11	120	1	2	25	35	30	30.5	30.5	65	95	80.67	78	79.5
06.04.2020	0	120	0	2	26	34	30	30.5	29	74	89	81.33	81.25	84.5
07.04.2020	10	130	0	2	25	35	30	30.5	26	62	91	74.75	81.5	88.25
08.04.2020	15	145	1	3	27	33	30	29	29	72	90	83	83	82.25
09.04.2020	13	158	0	3	27	35	31	29	29	59	89	77	81.25	81
10.04.2020	8	166	0	3	26	33	29.5	30.5	30	71	89	80	76.5	84.5
11.04.2020	11	177	2	5	26	33	29.5	25.5	30	70	91	80	85	79.75
12.04.2020	2	179	0	5	27	35	31	30	30.5	62	85	76.5	80.67	78
13.04.2020	13	192	0	5	28	34	31	30	30.5	63	88	76.5	81.33	81.25
14.04.2020	25	217	2	7	27	34	30.5	30	30.5	66	87	78.25	74.75	81.5
15.04.2020	18	235	3	10	28	35	31.5	30	29	62	88	76.75	83	83
16.04.2020	19	254	0	10	28	33	30.5	31	29	71	86	82	77	81.25
17.04.2020	32	286	3	13	28	34	31	29.5	30.5	71	87	80	80	76.5
18.04.2020	23	309	1	14	27	34	30.5	29.5	25.5	64	89	78	80	85
19.04.2020	70	379	0	14	27	31	29	31	30	76	89	83.5	76.5	80.67
20.04.2020	0	379	2	16	26	35	30.5	31	30	62	90	76.75	76.5	81.33
21.04.2020	59	438	0	16	26	35	30.5	30.5	30	65	92	81.5	78.25	74.75
22.04.2020	74	512	2	18	23	33	28	31.5	30	68	92	82.5	76.75	83
23.04.2020	78	590	0	18	25	33	29	30.5	31	67	91	79	82	77
24.04.2020	80	670	1	19	27	34	30.5	31	29.5	65	92	79.75	80	80
25.04.2020	33	703	0	19	27	33	30	30.5	29.5	71	88	81.75	78	80
26.04.2020	43	746	0	19	22	31	26.5	29	31	80	94	89.25	83.5	76.5
27.04.2020	34	780	0	19	25	33	29	30.5	31	65	91	80.25	76.75	76.5
28.04.2020	80	860	0	19	22	33	27.5	30.5	30.5	66	97	82.25	81.5	78.25
29.04.2020	87	947	1	20	23	32	28.5	28	31.5	71	93	83.5	82.5	76.75
30.04.2020	45	992	1	21	26	31	28.5	29	30.5	78	93	84.5	79	82
01.05.2020	30	1022	4	25	25	33	29	30.5	31	65	90	76.5	79.75	80
02.05.2020	62	1084	3	28	27	34	30.5	30	30.5	66	85	79	81.75	78
03.05.2020	39	1123	2	30	24	31	27.5	26.5	29	71	94	84	89.25	83.5
04.05.2020	76	1199	1	31	24	32	28	29	30.5	65	90	80.75	80.25	76.75
05.05.2020	43	1242	0	31	26	34	30	27.5	30.5	63	93	80.25	82.25	81.5
06.05.2020	82	1324	2	33	27	34	30.5	28.5	28	64	94	80.25	83.5	82.5
07.05.2020	183	1507	0	33	27	33	30	28.5	29	69	91	81.25	84.5	79
08.05.2020	176	1683	0	33	27	34	30.5	29	30.5	67	92	80.25	76.5	79.75
09.05.2020	97	1780	0	33	26	34	30	30.5	30	68	90	80.5	79	81.75
10.05.2020	81	1861	0	33	25	29	27	27.5	26.5	83	96	90.5	84	89.25
11.05.2020	88	1949	1	34	25	31	28	28	29	73	94	84.75	80.75	80.25
12.05.2020	57	2006	0	34	25	33	29	30	27.5	63	95	80.75	80.25	82.25
